# 1 The preservation of ancient DNA in 2 archaeological fish bone

3

4 Running title: High-throughput sequencing of fish bone

5 Giada Ferrari<sup>1\*</sup>, Angelica Cuevas<sup>1</sup>, Agata T. Gondek-Wyrozemska<sup>1,2</sup>, Rachel Ballantyne<sup>3</sup>, Oliver  
6 Kersten<sup>1</sup>, Albína H. Pálsdóttir<sup>1</sup>, Inge van der Jagt<sup>4</sup>, Anne-Karin Hufthammer<sup>5</sup>, Ingrid Ystgaard<sup>6</sup>,  
7 Stephen Wickler<sup>7</sup>, Gerald F. Bigelow<sup>8</sup>, Jennifer Harland<sup>9</sup>, Rebecca Nicholson<sup>10</sup>, David Orton<sup>11</sup>,  
8 Benoît Clavel<sup>12</sup>, Sanne Boessenkool<sup>1</sup>, James H. Barrett<sup>3,13</sup>, Bastiaan Star<sup>1\*</sup>

9

10 \*Corresponding authors

11

12 Email:

13 [giada.ferrari@ibv.uio.no](mailto:giada.ferrari@ibv.uio.no)

14 [bastiaan.star@ibv.uio.no](mailto:bastiaan.star@ibv.uio.no)

15

16 <sup>1</sup> Centre for Ecological and Evolutionary Synthesis, Department of Biosciences, University of Oslo,  
17 Blindernveien 31, NO-0371 Oslo, Norway

18 <sup>2</sup> Norwegian College of Fishery Science, Faculty of Biosciences, Fisheries & Economics, University  
19 of Tromsø – The Arctic University of Norway, Tromsø, Norway

20 <sup>3</sup> McDonald Institute for Archaeological Research, Department of Archaeology, University of  
21 Cambridge, Cambridge, CB2 3ER, UK

22 <sup>4</sup> Cultural Heritage Agency of the Netherlands, Department of Archaeology, Smallepad 5, 3811 MG  
23 Amersfoort, The Netherlands

24 <sup>5</sup> The University Museum, Department of Natural History, University of Bergen, N-5020 Bergen  
25 Norway

26 <sup>6</sup> Department for Historical and Classical Studies, Norwegian University of Science and  
27 Technology

28 <sup>7</sup> The Arctic University Museum of Norway, Tromsø, Norway

29 <sup>8</sup> Bates College, Pettengill Hall, Lewiston, Maine 04240, USA

30 <sup>9</sup> Orkney College, University of the Highlands and Islands, East Road, Kirkwall, Orkney, KW15 1LX,  
31 UK

32 <sup>10</sup> Oxford Archaeology, Janus House, Osney Mead, Oxford, OX2 0ES, UK

33 <sup>11</sup> Department of Archaeology, University of York, York, UK

34 <sup>12</sup> CNRS, UMR 7209 AASPE, Muséum national d'histoire naturelle (MNHN), CRAVO, Paris, France

35 <sup>13</sup> Department of Archaeology and Cultural History, NTNU University Museum, 7491 Trondheim,  
36 Norway

37

38 **Keywords**

39 Endogenous DNA, bleach, bone element, bone remodeling, petrous bone

## 40 Abstract

41 The field of ancient DNA is taxonomically dominated by studies focusing on mammals. This  
42 taxonomic bias limits our understanding of endogenous DNA preservation for vertebrate taxa  
43 with different bone physiology, such as teleost fish. In contrast to most mammalian bone, teleost  
44 bone is typically brittle, porous, lightweight and is characterized by a lack of bone remodeling  
45 during growth. Using high-throughput shotgun sequencing, we here investigate the preservation  
46 of DNA in a range of different bone elements from over 200 archaeological Atlantic cod (*Gadus*  
47 *morhua*) specimens from 38 sites in northern Europe, dating up to 8000 years before present. We  
48 observe that the majority of archaeological sites (79%) yield endogenous DNA, with 40% of sites  
49 providing samples that contain high levels (> 20%). Library preparation success and levels of  
50 endogenous DNA depend mainly on excavation site and pre-extraction laboratory treatment. The  
51 use of pre-extraction treatments lowers the rate of library success, although — if successful — the  
52 fraction of endogenous DNA can be improved by several orders of magnitude. This trade-off  
53 between library preparation success and levels of endogenous DNA allows for alternative  
54 extraction strategies depending on the requirements of down-stream analyses and research  
55 questions. Finally, we find that — in contrast to mammalian bones — different fish bone elements  
56 yield similar levels of endogenous DNA. Our results highlight the overall suitability of  
57 archaeological fish bone as a source for ancient DNA and provide novel evidence for a possible  
58 role of bone remodeling in the preservation of endogenous DNA across different classes of  
59 vertebrates.

60

## 61 Introduction

62 Driven by revolutionary advances in laboratory methods, sequencing technologies and  
63 downstream analyses, an increasing number of (non-)model species have been investigated using  
64 ancient DNA (aDNA). Such studies have addressed a wide range of questions related to archaic  
65 human history, animal domestication, or extinct megafauna (e.g., Hofreiter et al., 2015; Ollivier et  
66 al., 2018; Palkopoulou et al., 2018; Skoglund & Mathieson, 2018) and have yielded fundamental  
67 methodological insights. For instance, a seminal discovery revealed that the petrous bone, i.e., the  
68 *pars petrosa* of the temporal bone, which is the hardest and densest bone in mammals (Frisch et  
69 al., 1998), has an increased potential of containing high levels of endogenous DNA (Gamba et al.,  
70 2014; Pinhasi et al., 2015). Knowing which type of bone element may yield the best results for  
71 aDNA research is crucial for a variety of reasons. First, focusing on sampling bone elements with  
72 high endogenous DNA greatly improves the economy of high-throughput sequencing studies  
73 (Rizzi et al., 2012) and helps avoid costly analyses for samples that are likely suboptimal. Second,  
74 sampling for aDNA is most often destructive. Knowing how to select the right elements helps  
75 minimize the destruction of unique archaeological materials that represent a finite resource  
76 (Pálsdóttir et al., 2019). Third, such knowledge may further aid archaeologists in making informed  
77 choices when collecting and preserving zooarchaeological material in the field, maximizing the  
78 research potential for a variety of studies. This insight has therefore transformed the field of  
79 aDNA, allowing the cost-efficient, genome-wide analysis of hundreds of individual ancient  
80 specimens (e.g., Damgaard et al., 2018; Fages et al., 2019; Mathieson et al., 2018; Olalde et al.,  
81 2018).

82 In mammals, low bone density is usually associated with poor DNA preservation (Geigl & Grange,  
83 2018). Archaeological fish bone (Figure 1A) is typically lightweight, porous, brittle and  
84 susceptible to taphonomic damage (Szpak, 2011) and such bone could thus be considered a

85 suboptimal source of aDNA from a mammalian preservation perspective. In contrast to mammals,  
86 however, fish bone does not serve as a calcium reservoir under normal conditions (Moss, 1961;  
87 Witten & Huysseune, 2009). Most higher teleosts, including Atlantic cod (*Gadus morhua*), lack  
88 osteocytes (Kranenbarg et al., 2005; Moss, 1961; Shahar & Dean, 2013; Witten & Villwock, 1997).  
89 In acellular fish bone, bone remodeling takes place to a lesser extent and through different cellular  
90 and physiological processes (Harland & Van Neer, 2018; Kranenbarg et al., 2005; Witten &  
91 Villwock, 1997). An absence of bone remodeling may be important for DNA preservation for  
92 several reasons. For example, it has been suggested that an absence of cell *lacunae* improves the  
93 resistance of acellular fish bone to microbial degradation (Szpak, 2011). Moreover, recent  
94 evidence indicates that an absence of bone remodeling may aid DNA preservation in specific  
95 mammalian bone elements (Kontopoulos et al., 2019). It is therefore possible that the  
96 fundamental differences between mammalian and fish skeletal physiology, and especially the lack  
97 of bone remodeling in most fish, affects the aDNA preservation potential of archaeological fish  
98 bone.

99 Interestingly, multiple studies have reported the successful retrieval of aDNA from archaeological  
100 fish bone for a variety of species, locations and age (Oosting et al., 2019). aDNA has been  
101 consistently amplified from herring (Speller et al., 2012), Pacific salmon (Grier et al., 2013;  
102 Johnson et al., 2018; Royle et al., 2018; Speller et al., 2005; Yang et al., 2004), Atlantic cod  
103 (Hutchinson et al., 2015; Ólafsdóttir et al., 2014), sturgeon (Ludwig et al., 2009; Nikulina &  
104 Schmölcke, 2016; Pagès et al., 2009), Mediterranean trout (Splendiani et al., 2016), Northern pike  
105 (Wooller et al., 2015), and other fish taxa (Arndt et al., 2003; Ciesielski & Makowiecki, 2005;  
106 Živaljević et al., 2017), in some cases from bones up to 6,000 yBP or older (Johnson et al., 2018;  
107 Nikulina & Schmölcke, 2016; Speller et al., 2012; Splendiani et al., 2016; Wooller et al., 2015; Yang  
108 et al., 2004). Fish aDNA has also been successfully amplified in metagenomic analyses using bulk  
109 bone approaches, even from warm tropical climates (Grealy et al., 2016). Finally, high-throughput  
110 sequencing (HTS) approaches have yielded high levels (15-50%) of endogenous DNA from a

111 limited number of sites up to one thousand years old (Boessenkool et al., 2017; Star et al., 2017).  
112 Despite the clear potential for aDNA preservation in archaeological fish remains, however, no  
113 studies have yet investigated the factors that underlie this preservation and it is unclear if the  
114 expectation of intra-skeletal variability in DNA preservation observed for mammals is applicable  
115 to other vertebrate taxa such as fish.

116 Here, we investigate the preservation of aDNA in archaeological Atlantic cod bones ( $n = 204$ )  
117 obtained from 38 excavations in northern Europe, dating from 6500 BCE to c.1650 CE (spanning  
118 the Mesolithic to early modern periods, Figure 1B, Tables 1 and S1). We use a HTS approach to  
119 investigate whether bone element, archaeological site, DNA extraction method, and/or  
120 sequencing library preparation protocol can be used to predict library success (i.e., the successful  
121 retrieval and amplification of aDNA) and the relative proportion of endogenous DNA. We interpret  
122 our results in light of down-stream analytical requirements and provide practical  
123 recommendations in order to maximize throughput and inference of whole genome sequencing  
124 (WGS) data from ancient fish bone.

## 125 Materials and Methods

### 126 Sample processing and DNA extraction

127 A total of 204 Atlantic cod bones originating from 38 sites (Figure 1B, Tables 1 and S1) were  
128 processed following one of three DNA extraction protocols – standard extraction (adapted from  
129 Dabney et al., 2013), with the inclusion of a pre-digestion step (DD, Damgaard et al., 2015), or with  
130 the addition of a mild bleach treatment and pre-digestion step (BLEDD, Boessenkool et al., 2017).  
131 All laboratory protocols were carried out in a dedicated aDNA clean laboratory at the University  
132 of Oslo following standard anti-contamination and authentication protocols (e.g., Cooper &  
133 Poinar, 2000; Gilbert et al., 2005; Llamas et al., 2017). Bones were UV-treated for 10 minutes per

134 side and pulverized using a stainless-steel mortar (Gondek et al., 2018) or a Retsch MM400 mixer  
135 mill. Up to two times 150-200 mg of bone powder was digested for 18-24 hours in 0.5 M EDTA,  
136 0.5 mg/ml proteinase K and 0.5% N-Laurylsarcosine. Digests were combined and DNA was  
137 extracted with 9 × volumes of PB buffer (QIAGEN) or a 3:2 mixture of QG buffer (QIAGEN) and  
138 isopropanol. MinElute purification was carried out using the QIAvac 24 Plus vacuum manifold  
139 system (QIAGEN). Parallel non-template controls were included. A subset of 73 samples was  
140 subjected to multiple treatments (Table S1).

### 141 Library preparation, sequencing and read processing

142 Single- or double-indexed blunt-end sequencing libraries were built from 15-16 µl of DNA extract  
143 or non-template extraction blank, following either the single-tube (BEST) protocol (Carøe et al.,  
144 2018) with the modifications described in (Mak et al., 2017) or following the Meyer-Kircher  
145 protocol (Kircher et al., 2012; Meyer & Kircher, 2010) with the modifications listed in (Schroeder  
146 et al., 2015). Blunt-end repair, adapter ligation and set up of indexing PCRs were performed in the  
147 aDNA clean laboratory. Library quality and concentration were inspected with a High Sensitivity  
148 DNA Assay on the Bioanalyzer 2100 (Agilent) or with a High Sensitivity NGS Fragment Analysis  
149 Kit on the Fragment Analyzer™ (Advanced Analytical). Libraries were sequenced on the Illumina  
150 HiSeq 2500 or HiSeq 4000 platforms at the Norwegian Sequencing Centre with paired-end 125  
151 bp (HiSeq 2500) or 150 bp (HiSeq 4000) reads and demultiplexed allowing zero mismatches in  
152 the index tag. Reads were downsampled ( $n = 100,000$ ) for each library and processed using  
153 PALEOMIX v.1.2.13 (Schubert et al., 2014). Paired-end reads were trimmed, filtered, and collapsed  
154 with AdapterRemoval v.2.1.7 (Lindgreen, 2012), discarding reads shorter than 25 bp. Collapsed  
155 reads were aligned to the Atlantic cod GadMor3 reference genome (Star et al., 2011; Tørresen et  
156 al., 2017) with BWA v.0.7.12 (Li & Durbin, 2009), using the aln algorithm with disabled seeding  
157 and a minimum quality score of 25. aDNA deamination patterns were assessed with mapDamage  
158 v.2.0.6 (Jónsson et al., 2013).

## 159 Statistical analysis

160 Samples that underwent multiple treatments ( $n = 73$ , 146 treatments) were used to fit a  
161 Generalized Linear Mixed Effect Model (GLM, family = binomial, using sample ID as random effect  
162 to account for paired data) to test the effect of DNA extraction protocol, library preparation  
163 protocol, site, and bone element on failure or success of library preparation (library outcome ~  
164 extraction protocol + library protocol + site + bone element + (1 | Sample)). Outcome of library  
165 preparation was also assessed using all generated libraries, excluding sites with less than three  
166 samples ( $n = 191$ ) and controlling for multiple treatments by randomly subsampling one  
167 treatment per sample. Subsampling was performed 100 times generating ( $i = 100$ ) resampled  
168 datasets. A GLM (library outcome ~ extraction protocol + library protocol + site + bone element)  
169 was run on all resampled datasets. A sensitivity analysis was run to evaluate the consistency of  
170 the results recording significant factors for each iteration. In order to test the effect of DNA  
171 extraction protocol, library preparation protocol, site, and bone element on endogenous DNA  
172 content successfully sequenced libraries (defined as libraries that yielded more than 10,000  
173 sequencing reads), excluding sites with less than three successful libraries ( $n = 124$  from 19 sites),  
174 were used to fit a Generalized Linear Regression (GLR, endogenous DNA fraction ~ extraction  
175 protocol + library protocol + site + bone element). Normality of the data for endogenous DNA  
176 content was tested by levels in each of the factors using a Shapiro-Wilk Normality Test. For the  
177 GLM and GLR described above several models were run discarding factors that did not show  
178 significance in more complex models. Akaike (AIC) and Bayesian Information Criterion (BIC) were  
179 used to select the best fitting models.

## 180 Results

181 A total of 277 sequencing libraries were generated from 204 Atlantic cod bones collected at 38  
182 archaeological sites (Figure 1B, Table S1). Of these, 140 libraries from 29 sites had a minimum



183 concentration of 0.1 ng/ $\mu$ l and were sequenced (Figure S1, Figure 3A). All libraries showed  
184 patterns of DNA fragmentation, fragment length, and deamination rates that were consistent with  
185 those of authentic aDNA (Jónsson et al., 2013; Figures S1 and S2, Table S1). Most samples ( $n =$   
186 131) were processed once, but a subset of samples ( $n = 73$ ) was processed using two or more  
187 treatment combinations, either using different extraction or library preparation protocols (Figure  
188 3B, Table S1). Bone elements were categorized into three major groups – cranial, postcranial, and  
189 pectoral girdle bones (Figure 2A). The representation of these major groups differs across sites  
190 (Figure 2B, Table S1), which is driven by the availability of elements at the different locations or  
191 by post-excavation sample selection (Box 1).

192 Library preparation following the standard extraction protocol generated more successful  
193 sequencing libraries (70 out of 84 libraries yielded more than 10,000 sequencing reads)  
194 compared to the double digestion (DD) or combined double digestion and bleach (BLEDD)  
195 protocols (7 of 26 libraries for DD and 62 of 167 libraries for BLEDD, Figure 3A). The Meyer-  
196 Kircher (MK) library preparation protocol yielded a higher success rate (107 out of 150 libraries)  
197 than the single tube library protocol (BEST) (32 out of 127 libraries, Figure 3A). A number of  
198 library preparations ( $n = 62$ ) for sites with initial high failure rates were repeated using the  
199 standard extraction protocol without pre-extraction washes (Figure 3B) resulting in greater  
200 success rates. For example, library preparations after DNA extraction using the DD ( $n = 4$ ) or  
201 BLEDD ( $n = 5$ ) protocols for samples from the site of Ørland Main Air Base (site 4) failed, while  
202 library preparation following the standard DNA extraction protocol was more successful (14 out  
203 of 17 libraries, Table S1).

204 To statistically infer the most important factors explaining library success we applied two models.  
205 First, we focused on the samples that were processed with multiple treatments ( $n = 73$ , Figure  
206 3B). Second, we incorporated all samples generated from sites with more than three samples ( $n =$   
207 191 samples from 27 sites), correcting for multiple treatments by randomly downsampling a

208 single treatment per sample iteratively ( $i = 100$ , Figure 3C). The GLM focusing on the samples with  
209 multiple treatments (library outcome  $\sim$  extraction protocol + library protocol + site + bone  
210 element + (1 | Sample)) shows that the outcome is significantly dependent on DNA extraction and  
211 library preparation protocols (Table S2). The sensitivity analysis with the 100 iterations of GLMs  
212 incorporating all samples (library outcome  $\sim$  extraction protocol + library protocol + site + bone  
213 element) shows similar results, with site and DNA extraction protocol as the most prevalent  
214 significant factors (presenting mean estimates across iterations of 4.50 and 3.79 respectively,  
215 Figure 3C), followed by library preparation protocol (mean estimate = 2.90). Bone element has no  
216 significant effect on library preparation outcome and after excluding it from the model the latter  
217 shows a better fit to the data (Table S3).

218 We further assessed whether the same factors affect levels of endogenous DNA for samples ( $n =$   
219 124) from 19 locations for which three or more specimens were successfully sequenced by fitting  
220 a GLR (endogenous DNA fraction  $\sim$  extraction protocol + library protocol + site + bone element).  
221 Significantly higher endogenous DNA contents are observed in samples that underwent the DD or  
222 BLEDD pre-treatments, compared to a standard DNA extraction (Figure 4A, Table S4). Given that  
223 a number of samples for which DD or BLEDD extraction failed ( $n = 62$ ) were re-extracted using  
224 the standard protocol (figure 3B), such samples may *a priori* be suspected to have relatively poor  
225 DNA preservation. In contrast, library preparation protocol had no significant effect on  
226 endogenous DNA content (Table S4). Although postcranial bones tend to have lower levels of  
227 endogenous DNA, these differences are not significant, and especially bones from the cranial and  
228 pectoral girdle yield comparable levels of endogenous DNA, independent of DNA extraction  
229 protocol (Figure 4B, Table S4). Finally, we observe significant differences in endogenous DNA  
230 between sites (Figure 4C, Table S4) with 8 out of 19 sites yielding samples with high levels (>  
231 20%) of endogenous DNA, which includes the oldest excavation (Sævarhelleren, site 7, dated to  
232 ca. 6500-6200 BCE). When excluding the non-significant factors from the GLR (bone element and

233 library preparation protocol, Table S5), DNA extraction protocol and site remain significant. The  
234 most complex model including all factors shows the best fit to the data (Table S5).

## 235 Discussion

236 Here, we present the largest study on DNA preservation in ancient fish bones to date, assessing  
237 the effects of bone element, archaeological site, DNA extraction and sequencing library  
238 preparation protocols on library success and levels of endogenous DNA. We obtain several  
239 conclusions.

240 First, although we did not exhaustively sample all different elements possible, our findings imply  
241 that most fish bone elements of sufficient size may be suitable for high-throughput shotgun aDNA  
242 analyses. We observe no significant differences in either library preparation success or  
243 endogenous DNA levels amongst different bone element groups (i.e., cranial, pectoral girdle or  
244 postcranial) in archaeological fish bones. This observation is strikingly different from ancient DNA  
245 results obtained from mammalian bones, where high endogenous DNA preservation is localized,  
246 either in the petrous bone (Gamba et al., 2014; Pinhasi et al., 2015) or in the dense, recently  
247 deposited circumferential lamellae of long bones (Alberti et al., 2018). Moreover, our findings  
248 support a recent alternative hypothesis for DNA preservation in vertebrate bone. The localized  
249 DNA preservation in mammals has usually been explained by the observed high density of bones  
250 or bone regions (Bollongino et al., 2008; Geigl & Grange, 2018; Kendall et al., 2018; Alberti et al.,  
251 2018) that may be more resistant to exogenous microbial colonization or taphonomic degradation  
252 (Campos et al., 2012; Gamba et al., 2014). Recently, however, it has been suggested that it is the  
253 absence of bone remodeling in these bones that helps promote DNA preservation (Kontopoulos  
254 et al., 2019; Sirak et al., 2020), following observations that the petrous bone (Kontopoulos et al.,  
255 2019), the auditory ossicle (Sirak et al., 2020) and the circumferential lamellae of long bones  
256 (Treuting et al., 2017) experience little or no bone remodeling. This absence is analogous to the

257 lack of bone remodeling during growth in acellular fish bone (Kranenbarg et al., 2005; Witten &  
258 Villwock, 1997). Here, we provide novel comparative data supporting a hypothesis that distinct  
259 bone developmental characteristics, specifically bone remodeling (e.g., Kontopoulos et al., 2019;  
260 Sirak et al., 2020), may contribute to increased levels of endogenous DNA preservation in a wide  
261 range of vertebrates.

262 Second, depending on the down-stream computational requirements, sample sizes consisting of  
263 poor-quality DNA specimens can be increased in an economical way by avoiding pre-extraction  
264 digestion or bleach wash treatments. We observed a distinct trade-off between levels of  
265 endogenous DNA and library success when using bleach wash and pre-digestion treatments. As  
266 previously reported, bleach wash and pre-digestion treatments increase levels of endogenous  
267 DNA (e.g., (Boessenkool et al., 2017; Damgaard et al., 2015; Korlević et al., 2015), yet this increase  
268 is coupled to higher failure rates during library creation. Presumably, when samples have  
269 relatively poor DNA preservation, this DNA can be lost using pre-extracting wash steps, resulting  
270 in the failure of a sample that could otherwise yield a sequencing library with low levels of  
271 endogenous DNA. This results in a trade-off where the number of investigated individuals can be  
272 maximized at the cost of sequencing depth or vice-versa. Such a trade-off can be exploited in  
273 situations where low sequencing coverage data can yield meaningful archaeological or biological  
274 information. For instance, genetic sex can be easily obtained for mammals using low numbers  
275 (e.g., < 10,000) of sequencing reads, even in samples with low levels (< 0.5%) of endogenous DNA  
276 (e.g., Barrett et al., 2020; Nistelberger et al., 2019; Pečnerová et al., 2017). Analogously, in Atlantic  
277 cod there are several large, ecologically important chromosomal inversions (e.g., Berg et al., 2016;  
278 Berg et al., 2017) that can easily be determined using low coverage sequencing data (Star et al.,  
279 2017).

280 Third, we recommend utilizing library protocols with intermediate purification procedures when  
281 targeting archaeological fish bones in order to maximize the potential of successful library

282 creation. It is advantageous to minimize hands-on-time and laboratory costs while simultaneously  
283 increasing sample throughput. For this reason, we implemented the single-tube (BEST) protocol  
284 (Carøe et al., 2018; Mak et al., 2017), which is an economically efficient protocol with a reduced  
285 number of purification steps compared to the Meyer-Kircher protocol (Kircher et al., 2012; Meyer  
286 & Kircher, 2010). Both protocols yield similar levels of endogenous DNA and can therefore be used  
287 to retrieve high-quality aDNA libraries from archaeological fish bone. Nonetheless, we did observe  
288 significantly increased library amplification failure rates when following BEST (Carøe et al., 2018;  
289 Mak et al., 2017), which reduces the efficiency of this method in overall sample throughput. During  
290 the BEST protocol, multiple enzymatic reactions occur successively in the same tube, and we  
291 suspect it is possible that this protocol is more sensitive to contaminants than protocols with  
292 intermediate purification steps such as the Meyer-Kircher protocol. It is further possible that  
293 archaeological fish bone contains more such contaminants than mammalian bone. Fish bone may  
294 therefore be less suited for single-tube library preparation protocols than mammalian bone,  
295 which can be more efficiently cleaned.

296 Finally, we conclude that a wide range of preservation and excavation conditions can yield high  
297 endogenous aDNA preservation in archaeological fish bone. We observe site-specific differences  
298 in aDNA preservation, with some sites yielding consistently high rates of library success and levels  
299 of endogenous DNA whereas others do not. These site-dependent results make it difficult to  
300 predict specific factors underlying sufficient aDNA preservation, as samples from each site are  
301 associated with a wide range of different, potentially unknown, *pre-* and *post-*excavation  
302 taphonomic processes. However, our results confirm that cave sites typically offer ideal  
303 conditions for DNA preservation (Bollongino et al., 2008; Hardy et al., 1995), thanks to stable low  
304 temperatures and lack of precipitation (Hedges & Millard, 1995). Here, we report the oldest WGS  
305 results for archaeological fish bone from the cave site of Sævarhelleren (site 7, Bergsvik et al.,  
306 2016), which is one of the sites with better DNA preservation despite being up to 8500 years old.  
307 In addition to this, we have obtained excellent DNA of bones obtained from dry shell middens (e.g.,

308 Orkney Quoygrew, site 12, Harland & Barrett, 2012), as well as bones from waterlogged sediments  
309 that were excavated decades ago (e.g., Haithabu Harbour, site 14, Heinrich, 2006).

310 Only a limited number of fish aDNA studies have been published, despite their environmental and  
311 economic importance, and the abundance of archaeological fish bone (Barrett, 2019; Oosting et  
312 al., 2019). Especially whole genome HTS approaches (e.g., Star et al., 2017) focusing on fish  
313 remains are rare. Here we show that, despite high variability in DNA preservation across  
314 archaeological sites, high endogenous aDNA can consistently be recovered from archaeological  
315 fish bone. Overall, we obtained successful sequencing libraries from 50% of all fish bone samples  
316 analyzed, retrieving samples with more than 20% endogenous DNA from 40% of sites. Our results  
317 provide insights for the study design and laboratory processing of archaeological fish bone  
318 remains, highlight the suitability of this material as a source for aDNA, and provide novel evidence  
319 for the role of bone remodeling in the preservation of DNA in vertebrate bone.

320

## 321 Data availability

322 All ancient read data are available at the European Nucleotide Archive, [www.ebi.ac.uk/ena](http://www.ebi.ac.uk/ena),  
323 (accession no. PRJEB37681).

## 324 Acknowledgments

325 We thank C. Amundsen for providing the Kongshavn and Skonsvika bone samples, M. Skage, S.  
326 Kollias and A. Tooming-Klunderud at the Norwegian Sequencing Centre for sequencing and  
327 processing of samples, and K. Dean for comments on the statistical analyses. This work was  
328 supported by Research Council of Norway Project “Catching the Past: Discovering the legacy of  
329 Atlantic cod exploitation using ancient DNA” (262777) and Leverhulme Trust Project “Northern  
330 Journeys: Reimagining the Medieval Revolution and its Aftermath” (MRF-2013-065). Analyses  
331 were performed on the Abel Cluster at the University of Oslo and the Norwegian metacentre for  
332 High Performance Computing (NOTUR), operated by the Department for Research Computing at  
333 the University of Oslo IT-department (USIT).

## 334 Author contributions

335 B.S., G.F. and J.H.B designed research; O.K., A.H.P., A.T.G. and G.F. carried out laboratory work. A.C.  
336 and G.F. analyzed data. A.K.H., I.Y., I.J., S.W., G.F.B., J.H., R.N., D.O., B.C., R.B. and J.H.B. provided  
337 samples and archaeological context information. R.B. selected UK specimens. B.S. and G.F. wrote  
338 the manuscript with input from all authors. B.S., J.H.B. and S.B. provided funding and consumables.  
339

340 Box 1

341 As part of the conservation process prior to long-distance transport, Atlantic cod were typically  
342 decapitated (Barrett, 1997) and thus archaeological sites can differ significantly in their bone  
343 element distribution (Orton et al., 2014). Specifically, if cod was caught locally, cranial bones may  
344 be observed in high abundance, whereas if cod was imported, postcranial bones are likely  
345 overrepresented. Bones from the pectoral girdle are anatomically close to the point of  
346 decapitation and their presence at import sites may therefore vary (Barrett, 1997; Orton et al.,  
347 2014). This variation is clear in the distribution of skeletal elements at different sites in this study  
348 (Figure 2B). For example, cod bones found at sites in Norway and Orkney are likely to originate  
349 from local catches where cranial bones are abundant. In contrast, sites in England and in the  
350 Netherlands are characterized by a lower availability of cranial bones. Moreover, by consistently  
351 sampling the same bone element, cranial bones also offer the opportunity to easily avoid  
352 resampling the same individual.

353



354 Table 1: Archaeological sites ( $n = 38$ ) in northwest Europe from which archaeological Atlantic cod  
 355 bones were obtained. For each site, the country, date and number of bones ( $n$ ) are provided.  
 356 Dating is based on archaeological context. For locations see also Figure 1B. NO = Norway, UK =  
 357 United Kingdom, DE = Germany, NL = The Netherlands, F = France.  
 358

| ID | Site name                        | Country | Date (BCE/CE)      | Samples (n) | References                                      |
|----|----------------------------------|---------|--------------------|-------------|-------------------------------------------------|
| 1  | Kongshavn                        | NO      | 1300-1400 CE       | 6           | (Amundsen, 2011)                                |
| 2  | Skonsvika                        | NO      | 1240-1390 CE       | 10          | (Amundsen, 2011)                                |
| 3  | Storvågan                        | NO      | 1150-1270 CE       | 7           | (Wickler, 2013)                                 |
| 4  | Ørland Main Air Base             | NO      | 200-400 CE         | 15          | (Storå et al., 2019)                            |
| 5  | Bjørkum                          | NO      | 700-1000 CE        | 5           | (Barrett et al., 2015); M. Ramstad, pers. comm) |
| 6  | Skipshelleren                    | NO      | 6000 BCE - 1000 CE | 6           | (Hjelle et al., 2006; Rosvold et al., 2013)     |
| 7  | Sævarhelleren                    | NO      | 6500-6200 BCE      | 6           | (Bergsvik et al., 2016)                         |
| 8  | Ruskeneset                       | NO      | 2000 BCE - 1000 CE | 6           | (Hufthammer, 2015)                              |
| 9  | Osterbakken                      | NO      | 2000 BCE - 1000 CE | 4           | (Hufthammer, 2015)                              |
| 10 | Oslo Mindets tomt                | NO      | pre-1175-1350 CE   | 7           | (Lie, 1988)                                     |
| 11 | Shetland Sandwich South          | UK      | 1100-1350 CE       | 3           | (Bigelow, 1989)                                 |
| 12 | Orkney Quoygrew                  | UK      | 1000-1200 CE       | 16          | (Harland & Barrett, 2012)                       |
| 13 | Schleswig Schild                 | DE      | c.1050-1280 CE     | 12          | (Heinrich, 1987)                                |
| 14 | Haihabu Harbour                  | DE      | c.800-1050 CE      | 11          | (Heinrich, 2006)                                |
| 15 | Wharram Percy                    | UK      | 1250-1400 CE       | 4           | (Barrett, 2005)                                 |
| 16 | York Coppergate 16-22            | UK      | 1040-1375 CE       | 4           | (Harland et al., 2016)                          |
| 17 | Lincoln Castle                   | UK      | 1150-1200 CE       | 8           | (Barrett, unpublished)                          |
| 18 | King's Lynn Raynham House        | UK      | 1250-1350 CE       | 1           | (Locker, 2000)                                  |
| 19 | Norwich Castle Mall              | UK      | 1050-1100 CE       | 1           | (Locker, 2009)                                  |
| 20 | Norwich Fishergate               | UK      | 1000-1150 CE       | 1           | (Locker, 1994)                                  |
| 21 | Thetford St. Barnabas' Hospital  | UK      | c.1000-1100 CE     | 3           | (Jones, 1984)                                   |
| 22 | Cambridge Corpus Christi College | UK      | 1500-1600 CE       | 4           | (Harland, 2007)                                 |
| 23 | Cambridge Grand Arcade           | UK      | 1300-1600 CE       | 12          | (Harland, 2019)                                 |
| 24 | Cambridge St. John's Triangle    | UK      | 1550-1650 CE       | 3           | (Harland, 2009)                                 |
| 25 | Bristol Broad Quay               | UK      | c.1000-1200 CE     | 1           | (Russ, 2011)                                    |
| 26 | Bristol Dundas Wharf             | UK      | c.1225-1400 CE     | 2           | (Jones & Watson, 1987)                          |
| 27 | Bristol Finzel's Reach           | UK      | 1125-1500 CE       | 9           | (Nicholson, 2017)                               |
| 28 | Bristol Redcliff Street 82-90    | UK      | c.1125-1375 CE     | 3           | (Nicholson, 2000)                               |
| 29 | Winchester Brook Street          | UK      | 1000-1350 CE       | 9           | (Barrett, unpublished)                          |
| 30 | Southampton French Quarter       | UK      | 1250-1350 CE       | 1           | (Nicholson, 2011)                               |
| 31 | Newport Ship                     | UK      | c.1469 CE          | 1           | (Russ, 2012)                                    |
| 32 | Leeuwarden Oldehoofsterkerkhof   | NL      | 725-900 CE         | 1           | (Thilderkvist, 2013)                            |
| 33 | Deventer Burseplein 434          | NL      | 1100-1250 CE       | 7           | (Beerenhout, 2015)                              |
| 34 | Rotterdam Hoogstraat             | NL      | 1300-1400 CE       | 3           | (Carmiggelt et al., 1997)                       |
| 35 | Vlaardingen Gat in de Markt      | NL      | 1200-1350 CE       | 8           | (Buitenhuis et al., 2006)                       |
| 36 | St. Georges sur l'Aa             | F       | 800-1000 CE        | 1           | (Clavel et al., 2015)                           |
| 37 | Lille Chateau de Courtrai        | F       | 1300-1400          | 2           | (Clavel, 2001)                                  |
| 38 | Paris St. Michel                 | F       | 1400-1500 CE       | 1           | (Clavel, 2001)                                  |

359

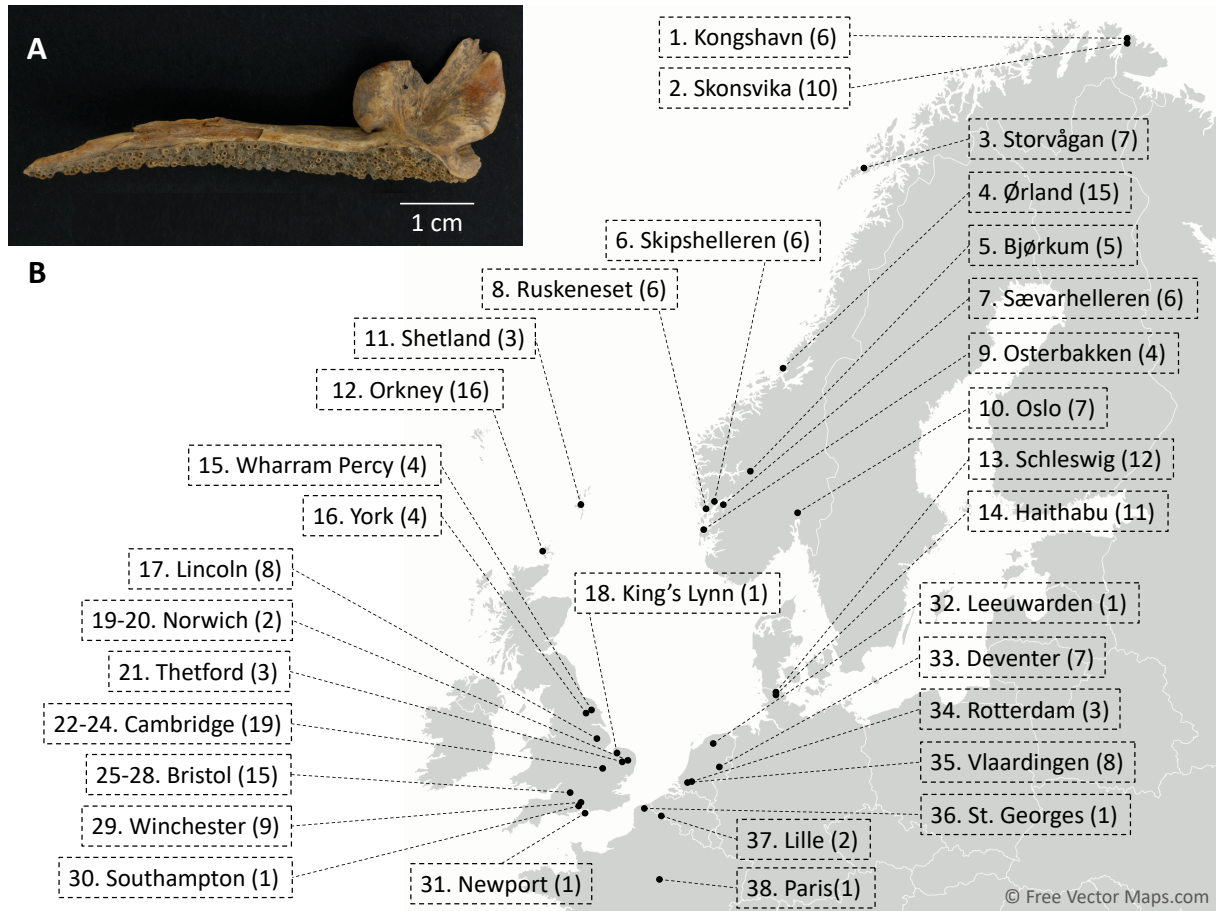

360

361 Figure 1: Archaeological Atlantic cod bones. (A) Archaeological Atlantic cod jawbone (premaxilla)  
 362 from the site of Orkney Quoygrew (1000-1200 CE). (B) Locations of fish bone specimens ( $n = 204$ )  
 363 from 38 archaeological sites. Bones from Norwich, Cambridge and Bristol were obtained from  
 364 distinct, individually numbered archaeological sites (see Table 1).

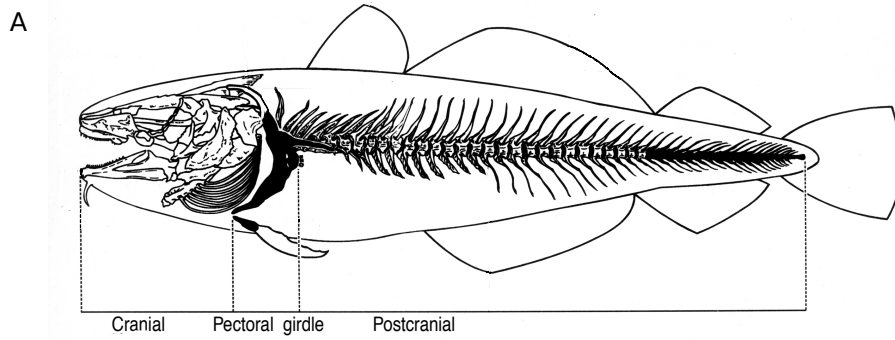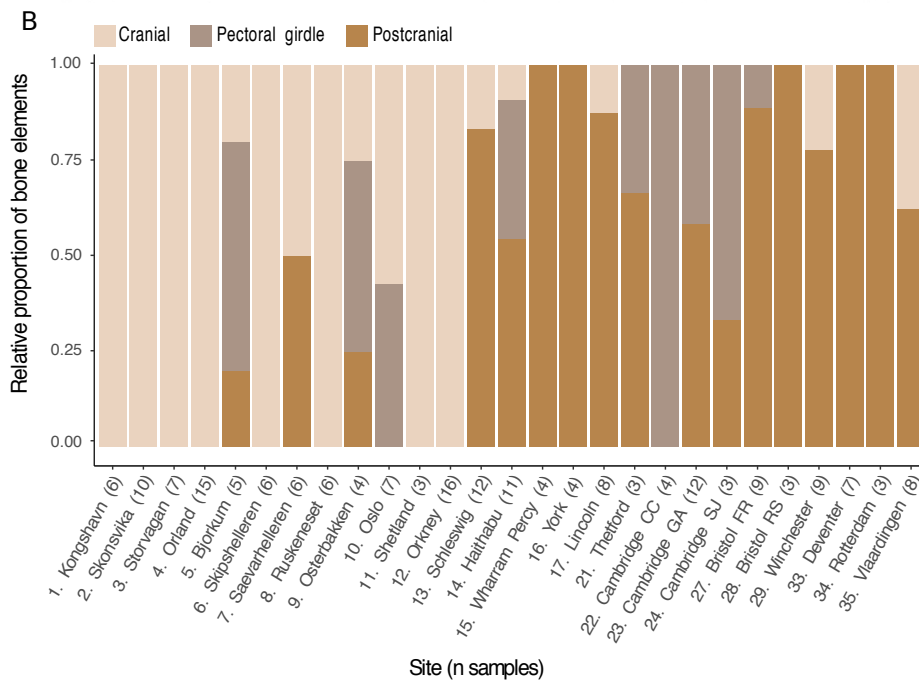

365

366 Figure 2: Distribution of Atlantic cod bone elements. (A) Classification of fish bone element  
 367 groups. Adapted from (Barrett et al., 1999). (B) Distribution of bone elements groups per site.  
 368 Only sites with three or more samples (n) are shown. Note that the distribution of selected bone  
 369 elements is not necessarily representative of their relative rate of retrieval at specific sites.

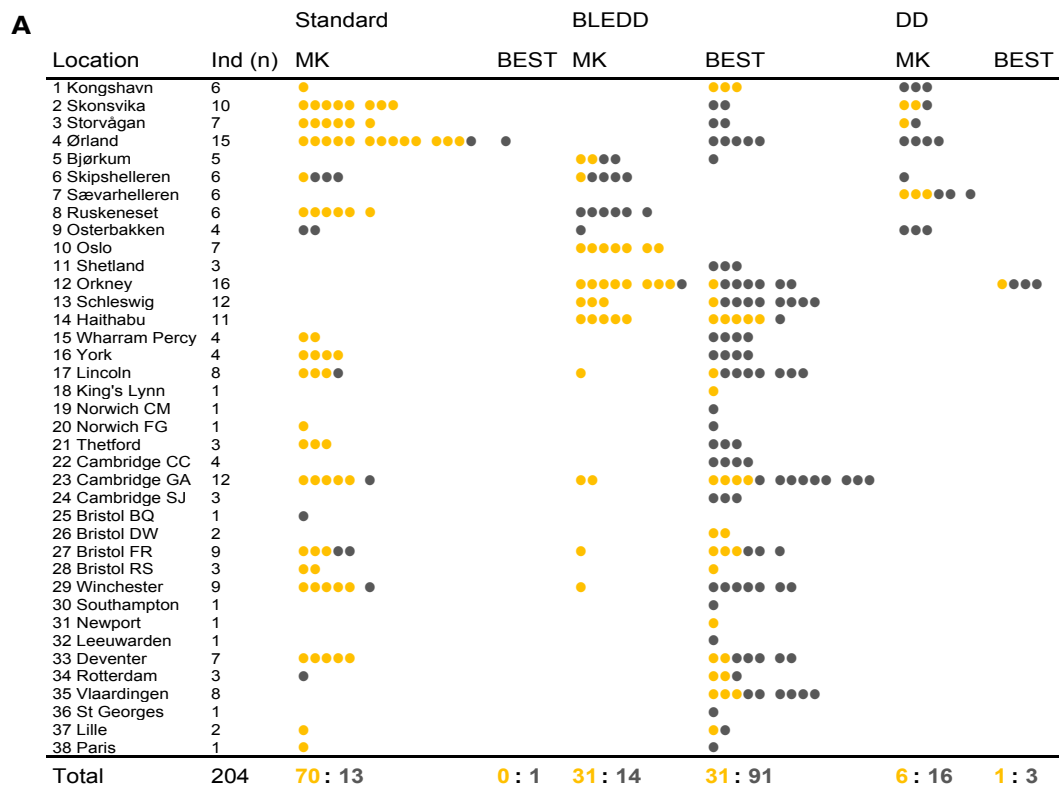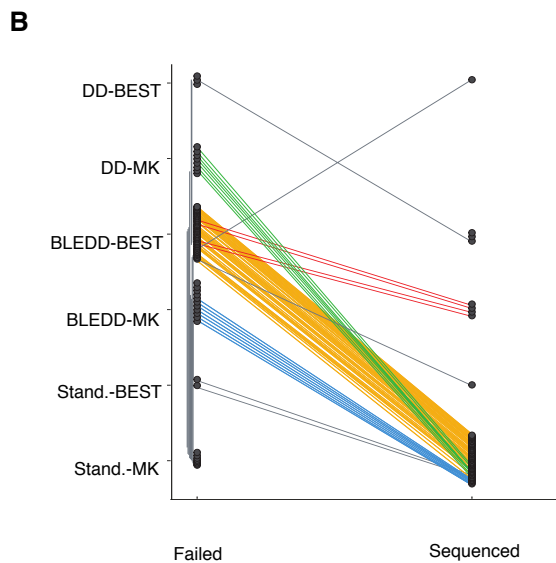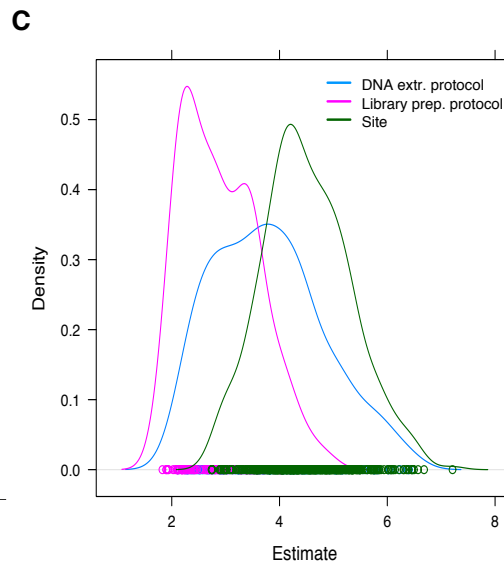

370

371 Figure 3: Success rates of high-throughput library preparation from Atlantic cod bones. (A)  
 372 Schematic of libraries generated for all archaeological sites (yellow, sequenced; gray, processed  
 373 but not sequenced library) divided into groups according to DNA extraction and library  
 374 preparation protocols utilized. Note that the number of libraries can be higher than the number  
 375 of specimens (Ind) due to multiple treatments. DD = double digestion extraction protocol, BLEDD  
 376 = bleach treatment combined with double digestion extraction protocol, MK = Meyer-Kircher  
 377 library preparation protocol, BEST = single tube library preparation protocol. (B) Treatment  
 378 overview and library outcomes (fail or success) for samples processed using multiple treatment  
 379 combinations ( $n = 73$ ). Different treatment combinations per individual are indicated by

380 connecting lines and colored according to treatment combination. (C) Sensitivity analysis: density  
 381 distribution of significant factors (site, DNA extraction and library preparation protocols)  
 382 following iterative ( $i = 100$ ) logistic regression (library outcome  $\sim$  extraction protocol + library  
 383 protocol + site + bone element + (1 | Sample)), using randomly resampled data.  
 384

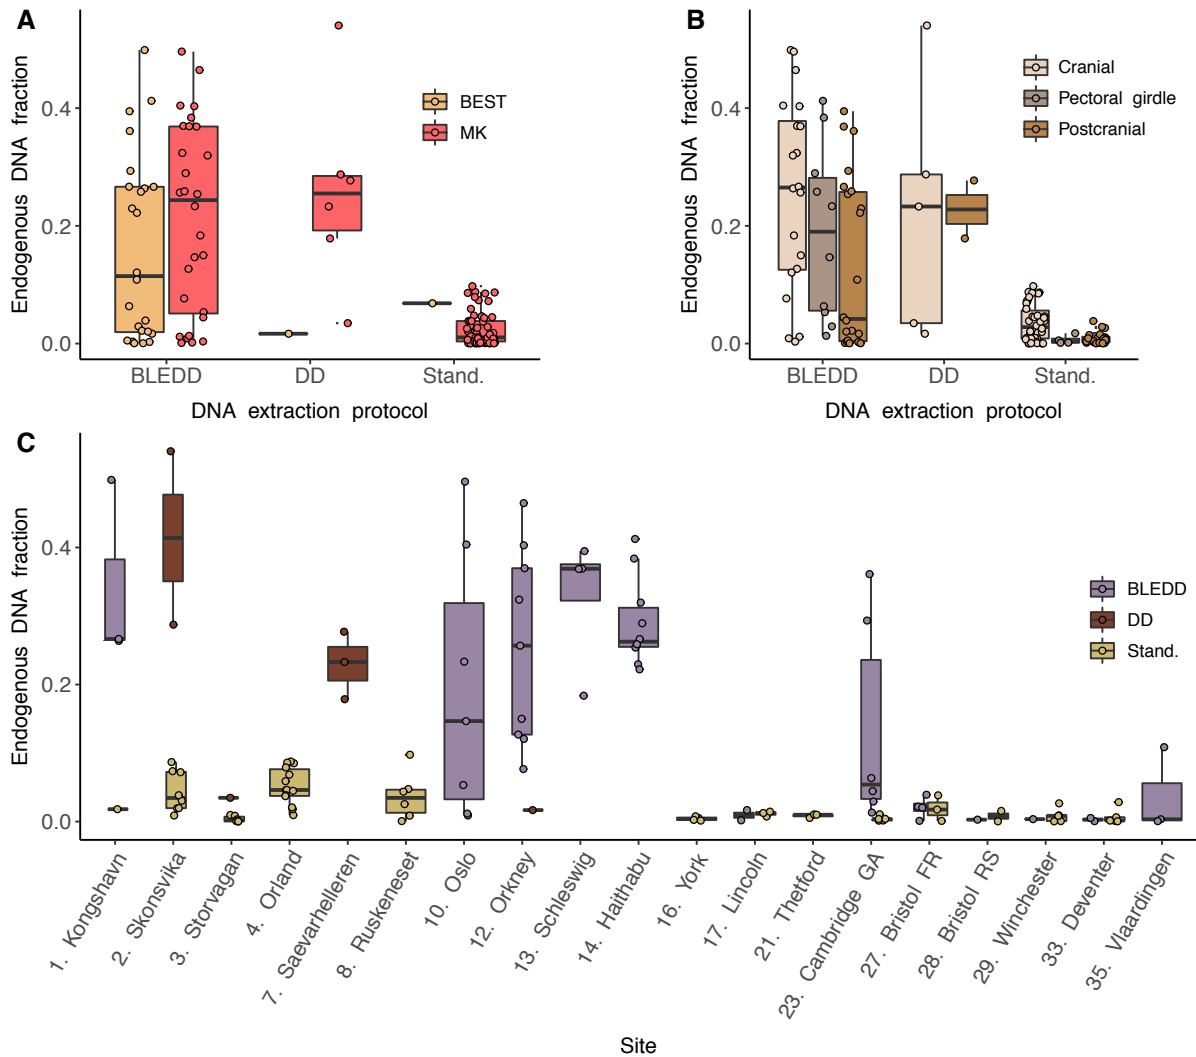

385  
 386 Figure 4: Endogenous DNA fraction. (A) Endogenous DNA per extraction and library preparation  
 387 protocols. Double digestion and mild bleach wash pre-treatments result in higher endogenous  
 388 DNA, independently from library preparation protocols. (B) Endogenous DNA per skeletal  
 389 element. No significant differences in endogenous DNA content can be observed between cranial,  
 390 postcranial and pectoral girdle bones. (C) Endogenous DNA per site. Significant differences in DNA  
 391 preservation can be observed between sites. DD = double digestion extraction protocol, BLEDD =  
 392 bleach treatment and double digestion extraction protocol, MK = Meyer-Kircher library  
 393 preparation protocol, BEST = single tube library preparation protocol. Only sites for which three  
 394 or more libraries were successfully sequenced are plotted.  
 395

- 397 Alberti, F., Gonzalez, J., Pajmans, J. L. A., Basler, N., Preick, M., Henneberger, K., Trinks, A., Rabeder, G.,  
398 Conard, N. J., Münzel, S. C., Joger, U., Fritsch, G., Hildebrandt, T., Hofreiter, M., & Barlow, A. (2018).  
399 Optimized DNA sampling of ancient bones using Computed Tomography scans. *Molecular Ecology*  
400 *Resources*, 18(6), 1196–1208.
- 401 Amundsen, C. (2011). The zoo-archaeology of multi-room houses. In B. Olsen & P. Urbanzyk (Eds.),  
402 *Hybrid Spaces? Medieval Finnmark and the Archaeology of Multi-room Houses* (pp. 241–264). Novus  
403 Press, Oslo.
- 404 Arndt, A., Van Neer, W., Hellems, B., Robben, J., Volckaert, F., & Waelkens, M. (2003). Roman trade  
405 relationships at Sagalassos (Turkey) elucidated by ancient DNA of fish remains. *Journal of*  
406 *Archaeological Science*, 30(9), 1095–1105.
- 407 Barrett, J. H. (1997). Fish trade in Norse Orkney and Caithness: a zooarchaeological approach. In *Antiquity*  
408 (Vol. 71, Issue 273, pp. 616–638). <https://doi.org/10.1017/s0003598x00085367>
- 409 Barrett, J.H., Nicholson, R.A., Cerón-Carrasco, R. (1999). Archaeo-ichthyological evidence for long-term  
410 socioeconomic trends in northern Scotland: 3500 BC to AD 1500. *Journal of Archaeological Science*,  
411 26, 353-388.
- 412 Barrett, J. H. (2005). The fish bone. In C. Treen & M. Atkin (Eds.), *Water Resources and their Management:*  
413 *Wharram, a study of settlement on the Yorkshire Wolds: Vol. X* (pp. 169–175). York University  
414 Archaeological Publications 12, York.
- 415 Barrett, J. H. (2019). An environmental (pre)history of European fishing: past and future archaeological  
416 contributions to sustainable fisheries. *Journal of Fish Biology*, 94(6), 1033–1044.
- 417 Barrett, J. H., Boessenkool, S., Kneale, C. J., O'Connell, T. C., & Star, B. (2020). Ecological globalisation, serial  
418 depletion and the medieval trade of walrus rostra. *Quaternary Science Reviews*, 229, 106122.
- 419 Barrett, J. H., Hufthammer, A. K., & Bratbakk, O. (2015). Animals and animal products at the Late Iron Age  
420 settlement of Bjørkum, Lærdal: the zooarchaeological evidence. *Bergen, University Museum of Bergen.*  
421 *Unpublished Report.*
- 422 Beerenhout, B. (2015). *Visresten uit de binnenstad van Deventer, Amsterdam (internal report).*
- 423 Berg, P. R., Star, B., Pampoulie, C., Bradbury, I. R., Bentzen, P., Hutchings, J. A., Jentoft, S., & Jakobsen, K. S.  
424 (2017). Trans-oceanic genomic divergence of Atlantic cod ecotypes is associated with large  
425 inversions. *Heredity*, 119(6), 418–428.
- 426 Berg, P. R., Star, B., Pampoulie, C., Sodeland, M., Barth, J. M. I., Knutsen, H., Jakobsen, K. S., & Jentoft, S.  
427 (2016). Three chromosomal rearrangements promote genomic divergence between migratory and  
428 stationary ecotypes of Atlantic cod. *Scientific Reports*, 6, 23246.
- 429 Bergsvik, K. A., Hufthammer, A. K., & Ritchie, K. (2016). The emergence of sedentism in Mesolithic western  
430 Norway. A case-study from the rockshelters of Sævarhelleren and Olsteinhelleren by the Hardanger  
431 fjord. In *Marine Ventures: Archaeological Perspectives on Human-Sea Relations*. (1st ed.). Equinox,  
432 Sheffield.
- 433 Bigelow, G. F. (1989). Life in medieval Shetland: An archaeological perspective. *Hikuin*, 15, 183–192.
- 434 Boessenkool, S., Hanghøj, K., Nistelberger, H. M., Der Sarkissian, C., Gondek, A. T., Orlando, L., Barrett, J. H.,  
435 & Star, B. (2017). Combining bleach and mild predigestion improves ancient DNA recovery from  
436 bones. *Molecular Ecology Resources*, 17(4), 742–751.
- 437 Bollongino, R., Tresset, A., & Vigne, J.-D. (2008). Environment and excavation: Pre-lab impacts on ancient  
438 DNA analyses. *Comptes Rendus. Palevol*, 7(2-3), 91–98.
- 439 Buitenhuis, H., Brinkhuizen, D. C., Van Loon, C., & de Ridder, T. (2006). *Gat in de Markt 1.101. Het dierlijk*  
440 *botmateriaal, Vlaardinggen (VLAK-verslag 15.5).*
- 441 Campos, P. F., Craig, O. E., Turner-Walker, G., Peacock, E., Willerslev, E., & Gilbert, M. T. P. (2012). DNA in  
442 ancient bone - where is it located and how should we extract it? *Annals of Anatomy*, 194(1), 7–16.
- 443 Carmiggelt, A., Guiran, A. J., & C., van T. M. (1997). *BOORbalans 3. Archeologisch onderzoek in het tracé van*  
444 *de Willemspoortunnel te Rotterdam, Rotterdam.*
- 445 Carøe, C., Gopalakrishnan, S., Vinner, L., Mak, S. S. T., Sinding, M. H. S., Samaniego, J. A., Wales, N., Sicheritz-  
446 Pontén, T., & Gilbert, M. T. P. (2018). Single-tube library preparation for degraded DNA. *Methods in*  
447 *Ecology and Evolution / British Ecological Society*, 9(2), 410–419.
- 448 Ciesielski, S., & Makowiecki, D. (2005). Ancient and modern mitochondrial haplotypes of common bream  
449 (*Abramis brama* L.) in Poland. *Ecology of Freshwater Fish*, 14(3), 278–282.
- 450 Clavel, B. (2001). L'animal dans L'alimentation médiévale et moderne en France du Nord (XIIe - XVIIe

451 siècles). *Revue Archeologique de Picardie*, 19, 1–204.

452 Clavel, B., Hanot, P., & Dréano, Y. (2015). Étude d'archéozoologie, période carolingienne-XIVe siècle. In E.

453 E. (Ed.), *Gravelines-Saint-Georges sur l'Aa, parc des rives de l'Aa : rapport de fouilles, Amiens: Inrap NP*

454 (Vol. 2, pp. 15–58).

455 Cooper, A., & Poinar, H. N. (2000). Ancient DNA: do it right or not at all. *Science*, 289(5482), 1139–1139.

456 Dabney, J., Knapp, M., Glocke, I., Gansauge, M.-T., Weihmann, A., Nickel, B., Valdiosera, C., García, N., Pääbo,

457 S., Arsuaga, J.-L., & Meyer, M. (2013). Complete mitochondrial genome sequence of a Middle

458 Pleistocene cave bear reconstructed from ultrashort DNA fragments. *Proceedings of the National*

459 *Academy of Sciences of the United States of America*, 110(39), 15758–15763.

460 Damgaard, P. B., Margaryan, A., Schroeder, H., Orlando, L., Willerslev, E., & Allentoft, M. E. (2015).

461 Improving access to endogenous DNA in ancient bones and teeth. *Scientific Reports*, 5, 11184.

462 Damgaard, P. de B., Marchi, N., Rasmussen, S., Peyrot, M., Renaud, G., Korneliussen, T., Moreno-Mayar, J. V.,

463 Pedersen, M. W., Goldberg, A., Usmanova, E., Baimukhanov, N., Loman, V., Hedegaard, L., Pedersen, A.

464 G., Nielsen, K., Afanasiev, G., Akmatov, K., Aldashev, A., Alpaslan, A., ... Willerslev, E. (2018). 137

465 ancient human genomes from across the Eurasian steppes. *Nature*, 557(7705), 369–374.

466 Fages, A., Hanghøj, K., Khan, N., Gaunitz, C., Seguin-Orlando, A., Leonardi, M., McCrory Constantz, C., Gamba,

467 C., Al-Rasheid, K. A. S., Albizuri, S., Alfarhan, A. H., Allentoft, M., Alquraishi, S., Anthony, D.,

468 Baimukhanov, N., Barrett, J. H., Bayarsaikhan, J., Benecke, N., Bernáldez-Sánchez, E., ... Orlando, L.

469 (2019). Tracking Five Millennia of Horse Management with Extensive Ancient Genome Time Series.

470 *Cell*, 177(6), 1419–1435.e31.

471 Frisch, T., Sørensen, M. S., Overgaard, S., Lind, M., & Bretlau, P. (1998). Volume-referent bone turnover

472 estimated from the interlabel area fraction after sequential labeling. *Bone*, 22(6), 677–682.

473 Gamba, C., Jones, E. R., Teasdale, M. D., McLaughlin, R. L., Gonzalez-Fortes, G., Mattiangeli, V., Domboróczki,

474 L., Kóvári, I., Pap, I., Anders, A., Whittle, A., Dani, J., Raczky, P., Higham, T. F. G., Hofreiter, M., Bradley,

475 D. G., & Pinhasi, R. (2014). Genome flux and stasis in a five millennium transect of European

476 prehistory. *Nature Communications*, 5, 5257.

477 Geigl, E.-M., & Grange, T. (2018). Ancient DNA: The quest for the best. *Molecular Ecology Resources*, 18(6),

478 1185–1187.

479 Gilbert, M. T. P., Bandelt, H.-J., Hofreiter, M., & Barnes, I. (2005). Assessing ancient DNA studies. *Trends in*

480 *Ecology & Evolution*, 20(10), 541–544.

481 Gondek, A. T., Boessenkool, S., & Star, B. (2018). A stainless-steel mortar, pestle and sleeve design for the

482 efficient fragmentation of ancient bone. *BioTechniques*, 64(6), 266–269.

483 Grealy, A., Douglass, K., Haile, J., Bruwer, C., Gough, C., & Bunce, M. (2016). Tropical ancient DNA from bulk

484 archaeological fish bone reveals the subsistence practices of a historic coastal community in

485 southwest Madagascar. *Journal of Archaeological Science*, 75, 82–88.

486 Grier, C., Flanigan, K., Winters, M., Jordan, L. G., Lukowski, S., & Kemp, B. M. (2013). Using ancient DNA

487 identification and osteometric measures of archaeological Pacific salmon vertebrae for

488 reconstructing salmon fisheries and site seasonality at Dionisio Point, British Columbia. *Journal of*

489 *Archaeological Science*, 40(1), 544–555.

490 Hardy, C., Callou, C., Vigne, J. D., Casane, D., Dennebouy, N., Mounolou, C. J., & Monnerot, M. (1995). Rabbit

491 mitochondrial DNA diversity from prehistoric to modern times. In *Journal of Molecular Evolution* (Vol.

492 40, Issue 3, pp. 227–237). <https://doi.org/10.1007/bf00163228>

493 Harland, J. (2007). *Technical Report: The fish bone from Hostel Yard, Corpus Christi College, Cambridge (site*

494 *code HYC04). Reports from the Centre for Human Palaeoecology, University of York 2008/4, 15pp.*

495 Harland, J. F. (2009). *Technical Report: The fish bone from St. John's Triangle, Cambridge (site code SJT07).*

496 *Reports from the Centre for Human Palaeoecology, University of York 2009/01, 24pp.*

497 Harland, J. F., & Barrett, J. H. (2012). The maritime economy: Fish bone. In J. H. Barrett (Ed.), *Being an*

498 *Islander: Production and Identity at Quoygre, Orkney, AD 900–1600* (pp. 115–138). McDonald

499 Institute for Archaeological Research, Cambridge.

500 Harland, J. F., Jones, A. K. G., Orton, D. C., & Barrett, J. H. (2016). Fishing and fish trade in medieval York:

501 The zooarchaeological evidence. In J. H. Barrett & D. C. Orton (Eds.), *Cod and Herring: The Archaeology*

502 *and History of Medieval Sea Fishing* (pp. 172–204). Oxbow Books, Oxford.

503 Harland, J., & Van Neer, W. (2018). Weird Fish: Defining a role for fish paleopathology. In L. Bartosiewicz &

504 E. Gal (Eds.), *Care or neglect? Evidence of animal disease in archaeology* (pp. 256–275).

505 Harland, J. (2019). Fish bone. In C. Cessford & A. Dickens (Eds.), *Medieval to Modern Suburban Material*

506 *Culture and Sequence at Grand Arcade, Cambridge: Archaeological Investigations of an Eleventh to*

507 *Twentieth-century Suburb and Town Ditch*, McDonald Institute for Archaeological Research,

- 508 Cambridge, (pp. 197-198, 350).
- 509 Hedges, R. E. M., & Millard, A. R. (1995). Bones and Groundwater: Towards the Modelling of Diagenetic  
510 Processes. In *Journal of Archaeological Science* (Vol. 22, Issue 2, pp. 155–164).  
511 <https://doi.org/10.1006/jasc.1995.0017>
- 512 Heinrich, D. (1987). *Untersuchungen an mittelalterlichen Fischresten aus Schleswig: Ausgrabung Schild*  
513 *1971-1975*. Karl Wachholtz Verlag, Neumünster.
- 514 Heinrich, D. (2006). Die fischreste aus dem Hafen von Haithabu - handaufgelesene funde. *Berichte über Die*  
515 *Ausgrabungen in Haithabu*, 35, 157–193.
- 516 Hjelle, K., Hufthammer, A. K., & Bergsvik, K. A. (2006). *Hesitant hunters: A review of the introduction of*  
517 *agriculture in western Norway*. 11(2), 147–170.
- 518 Hofreiter, M., Paijmans, J. L. A., Goodchild, H., Speller, C. F., Barlow, A., Fortes, G. G., Thomas, J. A., Ludwig,  
519 A., & Collins, M. J. (2015). The future of ancient DNA: Technical advances and conceptual shifts.  
520 *BioEssays: News and Reviews in Molecular, Cellular and Developmental Biology*, 37(3), 284–293.
- 521 Hufthammer, A. K. (2015). Osteological assemblages from rock shelters as source data for subsistence  
522 from Bronze Age to the Middle Ages in Western Norway. In S. Indrelid, K. L. Hjelle, & K. Stene (Eds.),  
523 *Exploitation of outfield resources* (pp. 231–241). University Museum, University of Bergen.
- 524 Hutchinson, W. F., Culling, M., Orton, D. C., Hänfling, B., Lawson Handley, L., Hamilton-Dyer, S., O'Connell, T.  
525 C., Richards, M. P., & Barrett, J. H. (2015). The globalization of naval provisioning: ancient DNA and  
526 stable isotope analyses of stored cod from the wreck of the Mary Rose, AD 1545. *Royal Society Open*  
527 *Science*, 2(9), 150199.
- 528 Johnson, B. M., Kemp, B. M., & Thorgaard, G. H. (2018). Increased mitochondrial DNA diversity in ancient  
529 Columbia River basin Chinook salmon *Oncorhynchus tshawytscha*. *PLoS One*, 13(1), e0190059.
- 530 Jones, A. K. G. (1984). Fish bones. In A. Rogerson & C. Dallas (Eds.), *Excavations in Thetford, 1948–59 and*  
531 *1973–80* (pp. 192–194). Norfolk Archaeological Unit, Gressenhall.
- 532 Jones, J., & Watson, N. (1987). The early medieval waterfront at Redcliffe, Bristol: A study of environment  
533 and economy. In N. D. Balaam & Levitan B Straker (Eds.), *Studies in Palaeoeconomy and Environment*  
534 *in South West England* (pp. 135–162). British Archaeological Reports British Series 181, Oxford.
- 535 Jónsson, H., Ginolhac, A., Schubert, M., Johnson, P. L. F., & Orlando, L. (2013). mapDamage2.0: fast  
536 approximate Bayesian estimates of ancient DNA damage parameters. *Bioinformatics*, 29(13), 1682–  
537 1684.
- 538 Kendall, C., Eriksen, A. M. H., Kontopoulos, I., Collins, M. J., & Turner-Walker, G. (2018). Diagenesis of  
539 archaeological bone and tooth. *Palaeogeography, Palaeoclimatology, Palaeoecology*, 491, 21–37.
- 540 Kircher, M., Sawyer, S., & Meyer, M. (2012). Double indexing overcomes inaccuracies in multiplex  
541 sequencing on the Illumina platform. *Nucleic Acids Research*, 40(1), e3.
- 542 Kontopoulos, I., Penkman, K., McAllister, G. D., Lynnerup, N., Damgaard, P. B., Hansen, H. B., Allentoft, M. E.,  
543 & Collins, M. J. (2019). Petrous bone diagenesis: a multi-analytical approach. *Palaeogeography,*  
544 *Palaeoclimatology, Palaeoecology*, 518, 143–154.
- 545 Korlević, P., Gerber, T., Gansauge, M.-T., Hajdinjak, M., Nagel, S., Aximu-Petri, A., & Meyer, M. (2015).  
546 Reducing microbial and human contamination in DNA extractions from ancient bones and teeth.  
547 *BioTechniques*, 59(2), 87–93.
- 548 Kranenbarg, S., van Cleynenbreugel, T., Schipper, H., & van Leeuwen, J. (2005). Adaptive bone formation in  
549 acellular vertebrae of sea bass (*Dicentrarchus labrax* L.). *The Journal of Experimental Biology*, 208(Pt  
550 18), 3493–3502.
- 551 Lie, R. W. (1988). Animal bones. In E. Schia (Ed.), *Mindets tomt - Søndre felt. Animal bones, moss-, plant-,*  
552 *insect- and parasite remains. De arkeologiske utgravninger i Gamlebyen* (Vol. 5, pp. 153–196). Øvre  
553 Ervik, Alvheim and Eide Akademisk Forlag.
- 554 Li, H., & Durbin, R. (2009). Fast and accurate short read alignment with Burrows–Wheeler transform.  
555 *Bioinformatics*, 25(14), 1754–1760.
- 556 Lindgreen, S. (2012). AdapterRemoval: easy cleaning of next-generation sequencing reads. *BMC Research*  
557 *Notes*, 5, 337.
- 558 Llamas, B., Valverde, G., Fehren-Schmitz, L., Weyrich, L. S., Cooper, A., & Haak, W. (2017). From the field to  
559 the laboratory: Controlling DNA contamination in human ancient DNA research in the high-  
560 throughput sequencing era. *STAR: Science & Technology of Archaeological Research*, 3(1), 1–14.
- 561 Locker, A. (1994). Fishbones. In B. S. Ayers (Ed.), *Excavations at Fishergate, Norwich 1985. East Anglian*  
562 *Archaeology* (Vol. 68, pp. 42–44).
- 563 Locker, A. (2000). The Fish Remains. In P. Cope-Faulkner (Ed.), *Archaeological Investigations at Raynham*  
564 *House, Austin Street, King's Lynn, Norfolk (5530KLY) Volume 1: The Excavation, Artefacts and*



565 *Environmental Reports, Unpublished report* (pp. 51–56). Archaeological Project Services, Lincoln.

566 Locker, A. (2009). Fish bones from Castle Mall. In U. Albarella, M. Beech, A. Locker, M. Moreno-Garcia, & J.

567 Mulville (Eds.), *Norwich Castle: Excavations and Historical Survey, 1987-98, Part III: A*

568 *Zooarchaeological Study* (pp. 131–145). East Anglian Archaeology Occasional Paper 22, Norwich.

569 Ludwig, A., Arndt, U., Debus, L., Rosello, E., & Morales, A. (2009). Ancient mitochondrial DNA analyses of

570 Iberian sturgeons. *Journal of Applied Ichthyology*, 25(1), 5–9.

571 Mak, S. S. T., Gopalakrishnan, S., Carøe, C., Geng, C., Liu, S., Sinding, M.-H. S., Kuderna, L. F. K., Zhang, W., Fu,

572 S., Vieira, F. G., Germonpré, M., Bocherens, H., Fedorov, S., Petersen, B., Sicheritz-Pontén, T., Marques-

573 Bonet, T., Zhang, G., Jiang, H., & Gilbert, M. T. P. (2017). Comparative performance of the BGISEQ-500

574 vs Illumina HiSeq2500 sequencing platforms for palaeogenomic sequencing. *GigaScience*, 6(8), 1–13.

575 Mathieson, I., Alpaslan-Roodenberg, S., Posth, C., Szécsényi-Nagy, A., Rohland, N., Mallick, S., Olalde, I.,

576 Broomandkoshbacht, N., Candilio, F., Cheronet, O., Fernandes, D., Ferry, M., Gamarra, B., Fortes, G. G.,

577 Haak, W., Harney, E., Jones, E., Keating, D., Krause-Kyora, B., ... Reich, D. (2018). The genomic history

578 of southeastern Europe. *Nature*, 555(7695), 197–203.

579 Meyer, M., & Kircher, M. (2010). Illumina sequencing library preparation for highly multiplexed target

580 capture and sequencing. *Cold Spring Harbor Protocols*, 2010(6), db.prot5448.

581 Moss, M. L. (1961). Studies of the acellular bone of teleost fish. *Cells Tissues Organs*, 46, 343–362.

582 Nicholson, R. A. (2000). Fish Remains from Excavations at 82-90 Redcliff Street, Bristol (C. Mag. 1999.31).

583 Unpublished Assessment Report.

584 Nicholson, R. A. (2011). Fish bone, in Trade and Prosperity, War and Poverty. An archaeological and

585 historical investigation into Southampton's French Quarter (Eds. R. Brown and A. Hardy), Oxford

586 Archaeology monograph 15, 233-240, Oxford.

587 Nicholson, R. (2017). Fish remains. In B. M. Ford, K. Brady, & S. Teague (Eds.), *From Bridgehead to*

588 *Brewery: The Medieval and Post-Medieval Archaeological Remains from Finzel's Reach, Bristol (CD*

589 *section 2.18)*. Oxford Archaeology, Oxford.

590 Nikulina, E. A., & Schmöcke, U. (2016). Reconstruction of the historical distribution of sturgeons

591 (Acipenseridae) in the eastern North Atlantic based on ancient DNA and bone morphology of

592 archaeological remains: implications for conservation and restoration programmes. *Diversity &*

593 *Distributions*, 22(10), 1036–1044.

594 Nistelberger, H. M., Pálsdóttir, A. H., Star, B., Leifsson, R., Gondek, A. T., Orlando, L., Barrett, J. H., Hallsson, J.

595 H., & Boessenkool, S. (2019). Sexing Viking Age horses from burial and non-burial sites in Iceland

596 using ancient DNA. *Journal of Archaeological Science*, 101, 115–122.

597 Ólafsdóttir, G. Á., Westfall, K. M., Edvardsson, R., & Pálsson, S. (2014). Historical DNA reveals the

598 demographic history of Atlantic cod (*Gadus morhua*) in medieval and early modern Iceland.

599 *Proceedings. Biological Sciences / The Royal Society*, 281(1777), 20132976.

600 Olalde, I., Brace, S., Allentoft, M. E., Armit, I., Kristiansen, K., Booth, T., Rohland, N., Mallick, S., Szécsényi-

601 Nagy, A., Mittnik, A., Altena, E., Lipson, M., Lazaridis, I., Harper, T. K., Patterson, N.,

602 Broomandkoshbacht, N., Diekmann, Y., Faltyskova, Z., Fernandes, D., ... Reich, D. (2018). The Beaker

603 phenomenon and the genomic transformation of northwest Europe. *Nature*, 555(7695), 190–196.

604 Ollivier, M., Tresset, A., Frantz, L. A. F., Bréhard, S., Bălăşescu, A., Mashkour, M., Boroneanţ, A., Pionnier-

605 Capitan, M., Lebrasseur, O., Arbogast, R.-M., Bartosiewicz, L., Debue, K., Rabinovich, R., Sablin, M. V.,

606 Larson, G., Hänni, C., Hitte, C., & Vigne, J.-D. (2018). Dogs accompanied humans during the Neolithic

607 expansion into Europe. *Biology Letters*, 14(10). <https://doi.org/10.1098/rsbl.2018.0286>

608 Oosting, T., Star, B., Barrett, J. H., Wellenreuther, M., Ritchie, P. A., & Rawlence, N. J. (2019). Unlocking the

609 potential of ancient fish DNA in the genomic era. *Evolutionary Applications*, 23, 327.

610 Orton, D. C., Morris, J., Locker, A., & Barrett, J. H. (2014). *Fish for the city: Meta-analysis of archaeological*

611 *cod remains and the growth of London's northern trade*. 88(340), 516–530.

612 Pagès, M., Desse-Berset, N., Tougard, C., Brosse, L., Hänni, C., & Berrebi, P. (2009). Historical presence of

613 the sturgeon *Acipenser sturio* in the Rhône basin determined by the analysis of ancient DNA

614 cytochrome b sequences. *Conservation Genetics*, 10(1), 217–224.

615 Palkopoulou, E., Lipson, M., Mallick, S., Nielsen, S., Rohland, N., Baleka, S., Karpinski, E., Ivancevic, A. M., To,

616 T.-H., Kortschak, R. D., Raison, J. M., Qu, Z., Chin, T.-J., Alt, K. W., Claesson, S., Dalén, L., MacPhee, R. D.

617 E., Meller, H., Roca, A. L., ... Reich, D. (2018). A comprehensive genomic history of extinct and living

618 elephants. *Proceedings of the National Academy of Sciences of the United States of America*, 115(11),

619 E2566–E2574.

620 Pálsdóttir, A. H., Bläuer, A., Rannamäe, E., Boessenkool, S., & Hallsson, J. H. (2019). Not a limitless resource:

621 ethics and guidelines for destructive sampling of archaeofaunal remains. *Royal Society Open Science*,

622 6(10), 191059.

623 Pečnerová, P., Díez-Del-Molino, D., Dussex, N., Feuerborn, T., von Seth, J., van der Plicht, J., Nikolskiy, P.,  
624 Tikhonov, A., Vartanyan, S., & Dalén, L. (2017). Genome-Based Sexing Provides Clues about Behavior  
625 and Social Structure in the Woolly Mammoth. *Current Biology: CB*, 27(22), 3505–3510.e3.

626 Pinhasi, R., Fernandes, D., Sirak, K., Novak, M., Connell, S., Alpaslan-Roodenberg, S., Gerritsen, F., Moiseyev,  
627 V., Gromov, A., Raczky, P., Anders, A., Pietruszewsky, M., Rollefson, G., Jovanovic, M., Trinhhoang, H.,  
628 Bar-Oz, G., Oxenham, M., Matsumura, H., & Hofreiter, M. (2015). Optimal Ancient DNA Yields from the  
629 Inner Ear Part of the Human Petrous Bone. *PLoS One*, 10(6), e0129102.

630 Rizzi, E., Lari, M., Gigli, E., De Bellis, G., & Caramelli, D. (2012). Ancient DNA studies: new perspectives on  
631 old samples. *Genetics, Selection, Evolution: GSE*, 44, 21.

632 Rosvold, J., Andersen, R., Linnell, J. D. C., & Hufthammer, A. K. (2013). Cervids in a dynamic northern  
633 landscape: Holocene changes in the relative abundance of moose and red deer at the limits of their  
634 distributions. *Holocene*, 23(8), 1143–1150.

635 Royle, T. C. A., Sakhrani, D., Speller, C. F., Butler, V. L., Devlin, R. H., Cannon, A., & Yang, D. Y. (2018). An  
636 efficient and reliable DNA-based sex identification method for archaeological Pacific salmonid  
637 (*Oncorhynchus* spp.) remains. *PLoS One*, 13(3), e0193212.

638 Russ, H. (2011). Fish bone. In M. Watts (Ed.), *Medieval and Post-Medieval Development within Bristol's*  
639 *Inner Suburbs*. Cotswold Archaeology, Bristol and Gloucestershire Archaeological Report 7,  
640 Cirencester.

641 Russ, H. (2012). *Fish remains from the Newport Ship (Newport Medieval Ship Project)*.  
642 [https://archaeologydataservice.ac.uk/archiveDS/archiveDownload?t=arch-1563-](https://archaeologydataservice.ac.uk/archiveDS/archiveDownload?t=arch-1563-2/dissemination/pdf/Newport_Medieval_Ship_Specialist_Report_Fish_Remains.pdf)  
643 [2/dissemination/pdf/Newport\\_Medieval\\_Ship\\_Specialist\\_Report\\_Fish\\_Remains.pdf](https://archaeologydataservice.ac.uk/archiveDS/archiveDownload?t=arch-1563-2/dissemination/pdf/Newport_Medieval_Ship_Specialist_Report_Fish_Remains.pdf)

644 Schroeder, H., Ávila-Arcos, M. C., Malaspinas, A.-S., Poznik, G. D., Sandoval-Velasco, M., Carpenter, M. L.,  
645 Moreno-Mayar, J. V., Sikora, M., Johnson, P. L. F., Allentoft, M. E., Samaniego, J. A., Haviser, J. B., Dee, M.  
646 W., Stafford, T. W., Jr, Salas, A., Orlando, L., Willerslev, E., Bustamante, C. D., & Gilbert, M. T. P. (2015).  
647 Genome-wide ancestry of 17th-century enslaved Africans from the Caribbean. *Proceedings of the*  
648 *National Academy of Sciences of the United States of America*, 112(12), 3669–3673.

649 Schubert, M., Ermini, L., Der Sarkissian, C., Jónsson, H., Ginolhac, A., Schaefer, R., Martin, M. D., Fernández,  
650 R., Kircher, M., McCue, M., Willerslev, E., & Orlando, L. (2014). Characterization of ancient and modern  
651 genomes by SNP detection and phylogenomic and metagenomic analysis using PALEOMIX. *Nature*  
652 *Protocols*, 9(5), 1056–1082.

653 Shahar, R., & Dean, M. N. (2013). The enigmas of bone without osteocytes. *BoneKEy Reports*, 2, 343.

654 Sirak, K., Fernandes, D., Cheronet, O., Harney, E., Mah, M., Mallick, S., Rohland, N., Adamski, N.,  
655 Broomandkhoshbacht, N., Callan, K., Candilio, F., Lawson, A. M., Mandl, K., Oppenheimer, J.,  
656 Stewardson, K., Zalzalá, F., Anders, A., Bartík, J., Coppa, A., ... Pinhasi, R. (2020). Human auditory  
657 ossicles as an alternative optimal source of ancient DNA. *Genome Research*, 30(3), 427–436.

658 Skoglund, P., & Mathieson, I. (2018). Ancient Genomics of Modern Humans: The First Decade. *Annual*  
659 *Review of Genomics and Human Genetics*, 19, 381–404.

660 Speller, C. F., Hauser, L., Lepofsky, D., Moore, J., Rodrigues, A. T., Moss, M. L., McKechnie, I., & Yang, D. Y.  
661 (2012). High potential for using DNA from ancient herring bones to inform modern fisheries  
662 management and conservation. *PLoS One*, 7(11), e51122.

663 Speller, C. F., Yang, D. Y., & Hayden, B. (2005). Ancient DNA investigation of prehistoric salmon resource  
664 utilization at Keatley Creek, British Columbia, Canada. *Journal of Archaeological Science*, 32(9), 1378–  
665 1389.

666 Splendiani, A., Fioravanti, T., Giovannotti, M., Negri, A., Ruggeri, P., Olivieri, L., Nisi Cerioni, P., Lorenzoni,  
667 M., & Caputo Barucchi, V. (2016). The Effects of Paleoclimatic Events on Mediterranean Trout:  
668 Preliminary Evidences from Ancient DNA. *PLoS One*, 11(6), e0157975.

669 Star, B., Boessenkool, S., Gondek, A. T., Nikulina, E. A., Hufthammer, A. K., Pampoulie, C., Knutsen, H., André,  
670 C., Nistelberger, H. M., Dierking, J., Peterleit, C., Heinrich, D., Jakobsen, K. S., Stenseth, N. C., Jentoft, S., &  
671 Barrett, J. H. (2017). Ancient DNA reveals the Arctic origin of Viking Age cod from Haithabu, Germany.  
672 *Proceedings of the National Academy of Sciences of the United States of America*, 114(34), 9152–9157.

673 Star, B., Nederbragt, A. J., Jentoft, S., Grimholt, U., Malmstrøm, M., Gregers, T. F., Rounge, T. B., Paulsen, J.,  
674 Solbakken, M. H., Sharma, A., Wetten, O. F., Lanzén, A., Winer, R., Knight, J., Vogel, J.-H., Aken, B.,  
675 Andersen, O., Lagesen, K., Tooming-Klunderud, A., ... Jakobsen, K. S. (2011). The genome sequence of  
676 Atlantic cod reveals a unique immune system. *Nature*, 477(7363), 207–210.

677 Storå, J., Ivarsson-Aalders, M., & Ystgaard, I. (2019). Utilization of animal resources in Roman Iron Age Vik:  
678 Zooarchaeology at Ørland. In I. Ystgaard (Ed.), *Environment and Settlement: Ørland 600 BC-AD 1250*.

- 679 *Archaeological excavations at Vik, Ørland Main Air Base* (pp. 233–258). Cappelen Damm Academic.
- 680 Szpak, P. (2011). Fish bone chemistry and ultrastructure: implications for taphonomy and stable isotope
- 681 analysis. *Journal of Archaeological Science*, 38(12), 3358–3372.
- 682 Thilderkvist, J. (2013). *Ritual bones or common waste. A study of Early Medieval bone deposits in Northern*
- 683 *Europe, Groningen* [PhD Thesis]. Rijksuniversiteit Groningen.
- 684 Tørresen, O. K., Star, B., Jentoft, S., Reinart, W. B., Grove, H., Miller, J. R., Walenz, B. P., Knight, J., Ekholm, J. M.,
- 685 Peluso, P., Edvardsen, R. B., Tooming-Klunderud, A., Skage, M., Lien, S., Jakobsen, K. S., & Nederbragt,
- 686 A. J. (2017). An improved genome assembly uncovers prolific tandem repeats in Atlantic cod. *BMC*
- 687 *Genomics*, 18(1), 95.
- 688 Treuting, P. M., Dintzis, S. M., & Montine, K. S. (Eds.). (2017). *Comparative anatomy and histology: a mouse,*
- 689 *rat, and human atlas*. Academic Press.
- 690 Wickler, S. (2013). The potential of shoreline and shallow submerged Iron Age and medieval
- 691 archaeological sites in the Lofoten Islands, northern Norway. In M.-Y. Daire, C. Dupont, A. Baudry, C.
- 692 Billard, J.-M. Large, L. Lespez, E. Normand, & C. Scarre (Eds.), *Anciens peuplements littoraux et*
- 693 *relations Homme/Milieu sur les côtes de l'Europe atlantique / Ancient Maritime Communities and the*
- 694 *Relationship between People and Environment along the European Atlantic Coasts* (pp. 63–72).
- 695 Archaeopress (BAR International Series 2570), Oxford.
- 696 Witten, P. E., & Huysseune, A. (2009). A comparative view on mechanisms and functions of skeletal
- 697 remodelling in teleost fish, with special emphasis on osteoclasts and their function. *Biological Reviews*
- 698 *of the Cambridge Philosophical Society*, 84(2), 315–346.
- 699 Witten, P. E., & Villwock, W. (1997). Growth requires bone resorption at particular skeletal elements in a
- 700 teleost fish with acellular bone (*Oreochromis niloticus*, Teleostei: Cichlidae). *Zeitschrift Fur*
- 701 *Angewandte Ichthyologie = Journal of Applied Ichthyology*, 13(4), 149–158.
- 702 Wooller, M. J., Gaglioti, B., Fulton, T. L., Lopez, A., & Shapiro, B. (2015). Post-glacial dispersal patterns of
- 703 Northern pike inferred from an 8800 year old pike (*Esox cf. lucius*) skull from interior Alaska.
- 704 *Quaternary Science Reviews*, 120, 118–125.
- 705 Yang, D. Y., Cannon, A., & Saunders, S. R. (2004). DNA species identification of archaeological salmon bone
- 706 from the Pacific Northwest Coast of North America. *Journal of Archaeological Science*, 31(5), 619–631.
- 707 Živaljević, I., Popović, D., Snoj, A., & Marić, S. (2017). Ancient DNA analysis of cyprinid remains from the
- 708 Mesolithic-Neolithic Danube Gorges reveals an extirpated fish species *Rutilus frisii* (Nordmann,
- 709 1840). *Journal of Archaeological Science*, 79, 1–9.
